# Supplementary material for: Air Pollution Exposure Monitoring among Pregnant Women with and without Asthma
Source: PubMed Central journal article supplement (PMC7369909; doi:10.3390/ijerph17134888), 2020-07-07
Supplement: ijerph-17-04888-s001.pdf [file ijerph-17-04888-s001.pdf]

## **Air pollution exposure monitoring among pregnant women with and without asthma**

Sandie Ha<sup>1</sup>, Carrie Nobles<sup>2</sup>, Jenna Kanner<sup>2</sup>, Seth Sherman<sup>3</sup>, Seung-Hyun Cho<sup>4</sup>, Neil Perkins<sup>2</sup>, Andrew Williams<sup>5</sup>, William Grobman<sup>6</sup>, Joseph Biggio<sup>7</sup>, Akila Subramaniam<sup>8</sup>, Marion Ouidir<sup>2</sup>, Zhen Chen<sup>2</sup>, Pauline Mendola<sup>2</sup>

Affiliations:

<sup>1</sup>Department of Public Health, College of Social Sciences, Humanities, and Arts, Health Sciences Research Institute, University of California, Merced, CA, USA

<sup>2</sup>Division of Intramural Population Health Research, *Eunice Kennedy Shriver* National Institute of Child Health and Human Development, Bethesda, MD, USA

<sup>3</sup>The Emmes Company, Rockville MD, USA

<sup>4</sup>RTI International, Research Triangle Park, NC, USA

<sup>5</sup>School of Medicine & Health Sciences, University of North Dakota, Grand Forks, ND, USA

<sup>6</sup>Feinberg School of Medicine, Northwestern University, Chicago IL, USA

<sup>7</sup>Ochsner Health System, New Orleans LA, USA

<sup>8</sup>The University of Alabama at Birmingham, Birmingham AL, USA

| Supplemental Figures and Tables                                                                                                                        | Page |
|--------------------------------------------------------------------------------------------------------------------------------------------------------|------|
| Figure S1. Wearable sensors used in the study: RTI MicroPEM, Cairpol CairClip, and Ogawa O <sub>3</sub> passive sampler                                | 2    |
| Figure S2. The air monitoring sensors in the monitoring platform worn by a model pregnant mother, mesh pouch including all monitors, and shipping tray | 2    |
| Figure S3. Distribution of air pollution exposure by asthma status                                                                                     | 3    |
| Table S1. Selected characteristics of study areas                                                                                                      | 4    |
| Table S2. Training video clips for air monitoring step-by-step instructions                                                                            | 5    |
| Table S3. Air pollution distributions by asthma status for Site 1.                                                                                     | 6    |
| Table S4. Air pollution distribution by study site                                                                                                     | 7    |
| Table S5. Correlation matrix for different pollutants across assessment methods.                                                                       | 8    |

Figure S1. Wearable sensors used in the study: RTI MicroPEM (left), Cairpol CairClip (middle), and Ogawa O<sub>3</sub> passive sampler (right)

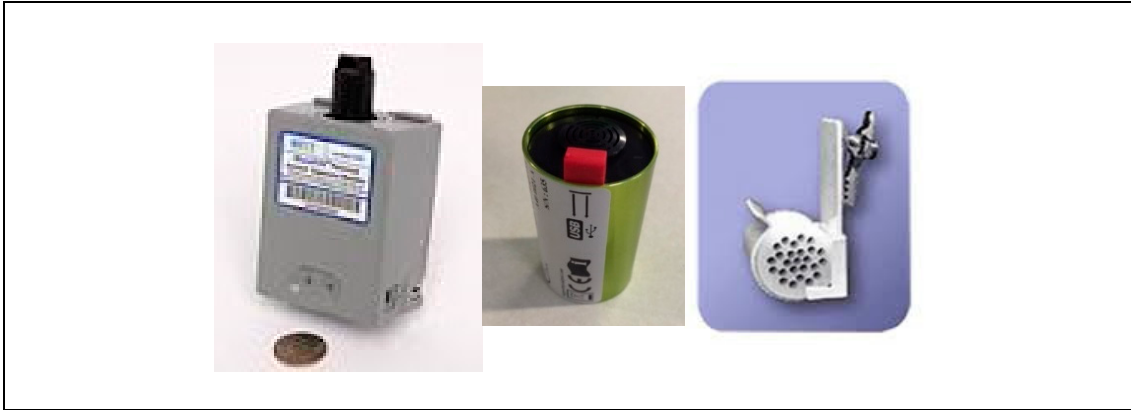

Figure S2. The air monitoring sensors in the monitoring platform worn by a model pregnant mother (left), mesh pouch including all monitors (middle), and shipping tray (right).

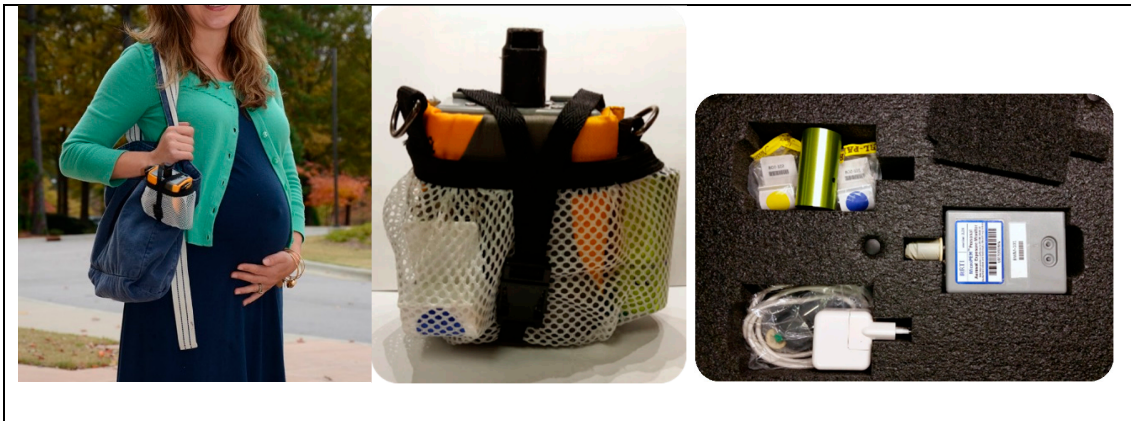

Figure S3. Distribution of air pollution exposure by asthma status.

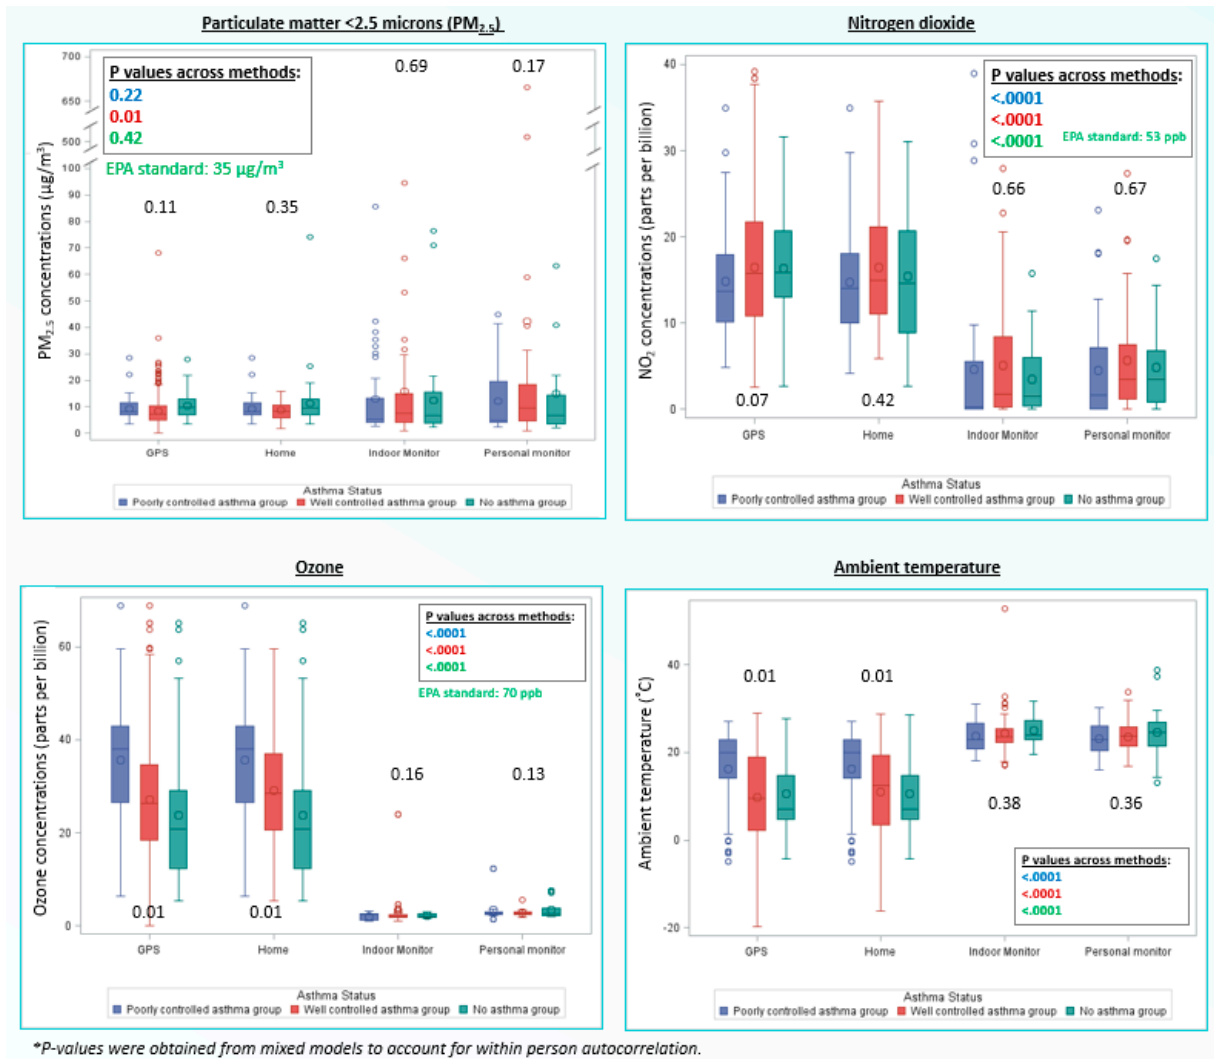

Table S1. Selected characteristics of study areas

| Characteristics                         | Chicago, IL    | Birmingham, AL |
|-----------------------------------------|----------------|----------------|
| Population size (Census 2010)           | 2,722,586      | 212,265        |
| Female Population                       | 51.50%         | 52.70%         |
| Median Age                              | 34.1           | 35.7           |
| Race/ethnicity                          |                |                |
| White                                   | 32.70%         | 22.80%         |
| Black                                   | 30.10%         | 71.30%         |
| Asian                                   | 6.20%          | 0.80%          |
| Native American                         | 0.10%          | 0.20%          |
| Hawaiian, Pacific Islander              | 0.00%          | 0.00%          |
| Other                                   | 0.20%          | 0.20%          |
| Two or More Races                       | 1.70%          | 1.20%          |
| Hispanic                                | 29.00%         | 3.50%          |
| Air pollution (2015-2018) (EPA AirData) |                |                |
| NO <sub>2</sub> (ppb)                   | 51.3(14.2)     | 40.2(15.9)     |
| Ozone (ppb)                             | 70.9(31.9)     | 55.6(23.9)     |
| PM <sub>2.5</sub> (ug/m3)               | 56.8(16.8)     | 51.7(13.8)     |
| Annual temperature (US Climate Data)    |                |                |
| Average low                             | 5.5 °C (42 F)  | 11.7 °C (53 F) |
| Average high                            | 13.9 °C (57 F) | 23.3 °C (74 F) |

Table S2. Training video clips for air monitoring step-by-step instructions

| Video Clip Descriptions       | YouTube Link                                                          |
|-------------------------------|-----------------------------------------------------------------------|
| Box Receipt at Clinic         | <a href="http://youtu.be/LjIBUvTSg8I">http://youtu.be/LjIBUvTSg8I</a> |
| Load MicroPEM™ battery        | <a href="http://youtu.be/D-e3JC4svlg">http://youtu.be/D-e3JC4svlg</a> |
| Start MicroPEM                | <a href="http://youtu.be/iU4uyPjcdL8">http://youtu.be/iU4uyPjcdL8</a> |
| Start CairClip                | <a href="http://youtu.be/_6DaVSymHpg">http://youtu.be/_6DaVSymHpg</a> |
| Start Ogawa                   | <a href="http://youtu.be/BiuRjT3G8AI">http://youtu.be/BiuRjT3G8AI</a> |
| How to Wear Personal Monitors | <a href="http://youtu.be/1QO83shPRMQ">http://youtu.be/1QO83shPRMQ</a> |
| Setting Up Indoor Monitors    | <a href="http://youtu.be/R3ACi_8LNR4">http://youtu.be/R3ACi_8LNR4</a> |
| End Monitoring and Pack Box   | <a href="http://youtu.be/Gv02ZfhDvQw">http://youtu.be/Gv02ZfhDvQw</a> |

Table S3. Air pollution distributions by asthma status for Site 1.

| Pollutant                              | Assessment method <sup>a</sup> | Assessment method <sup>a</sup> |                  |                   | p-value <sup>b</sup> |
|----------------------------------------|--------------------------------|--------------------------------|------------------|-------------------|----------------------|
|                                        |                                | No asthma                      | Well controlled  | Poorly controlled |                      |
| PM <sub>2.5</sub> (µg/m <sup>3</sup> ) | Home + EPA monitor             | 9.6(3.6-19)                    | 8.5(1.7-16)      | 9.2(3.6-28.5)     | 0.4399               |
|                                        | GPS + EPA monitor              | 10.2(3.6-28)                   | 8.4(1.7-14.6)    | 9.2(3.6-28.5)     | 0.1326               |
|                                        | Indoor                         | 11.8(2.3-76.5)                 | 15.6(1-132.8)    | 10(2.5-42.2)      | 0.4283               |
|                                        | Personal                       | 10.9(2.1-63.2)                 | 43.2(0.9-665.6)  | 10.4(2.4-44.7)    | 0.1545               |
|                                        | p-value exposure <sup>c</sup>  | 0.8825                         | 0.0120           | 0.8627            |                      |
| Ozone (ppb)                            | Home + EPA monitor             | 23.5(5.3-65)                   | 28.4(5.4-59.5)   | 33.9(6.3-68.8)    | 0.0028               |
|                                        | GPS + EPA monitor              | 23.5(5.3-65)                   | 28.5(5.4-59.5)   | 33.9(6.3-68.8)    | 0.0028               |
|                                        | Indoor                         | 2.1(1.6-2.7)                   | 3.3(1.1-23.9)    | 2(1.1-2.8)        | 0.1242               |
|                                        | Personal                       | 3.5(1.9-7.6)                   | 2.8(1.9-5.5)     | 3.6(1.5-12.2)     | 0.1343               |
|                                        | p-value exposure <sup>c</sup>  | <.0001                         | <.0001           | <.0001            |                      |
| NO <sub>2</sub> (ppb)                  | Home + EPA monitor             | 17.4(6.9-31)                   | 15.7(5.9-35.8)   | 16.5(4-35)        | 0.3908               |
|                                        | GPS + EPA monitor              | 18.5(7.9-31.6)                 | 15.6(5.5-34.7)   | 16.4(4-35)        | 0.0541               |
|                                        | Indoor                         | 3.7(0-15.8)                    | 5.4(0-27.9)      | 5.1(0-39)         | 0.6489               |
|                                        | Personal                       | 5.1(0-17.4)                    | 5.8(0-27.4)      | 4.6(0-23.1)       | 0.6724               |
|                                        | p-value exposure <sup>c</sup>  | <.0001                         | <.0001           | <.0001            |                      |
| Temperature (°C)                       | Home + EPA monitor             | 8(-4.4-28.5)                   | 12.1(-16.3-28.8) | 15.9(-4.8-27)     | 0.0012               |
|                                        | GPS + EPA monitor              | 8(-4.4-27.8)                   | 12(-16.3-28.8)   | 15.9(-4.8-27)     | 0.0011               |
|                                        | Indoor                         | 24.9(19.5-31.7)                | 24(17.1-52.8)    | 23(18.1-28.3)     | 0.1673               |
|                                        | Personal                       | 23.9(13.1-38.7)                | 23.1(16.8-27.6)  | 22.3(16-28)       | 0.2773               |
|                                        | p-value exposure <sup>c</sup>  | <.0001                         | <.0001           | 0.0002            |                      |

Abbreviation: GPS, global positioning system; EPA, US Environmental Protection Agency; PM<sub>2.5</sub>, particulate matter <2.5 microns; NO<sub>2</sub>, nitrogen dioxide

<sup>a</sup>The GPS and home method includes 24 participants, the personal monitoring method analysis includes 39 participants, and the indoors method include 40 participants.

<sup>b</sup>p-values were obtained cross asthma status by mixed models to account for within person variation.

<sup>c</sup>p-values were obtained cross assessment methods by mixed models to account for within person variation

Table S4. Air pollution distribution by study site

| Pollutant                              | Assessment method <sup>a</sup> | Mean (min-max)   |                 | p-value <sup>b</sup> |
|----------------------------------------|--------------------------------|------------------|-----------------|----------------------|
|                                        |                                | NWU              | UAB             |                      |
| PM <sub>2.5</sub> (µg/m <sup>3</sup> ) | Home + EPA monitor             | 9(1.7-28.5)      | 10.6(5.8-13.3)  | 0.4088               |
|                                        | GPS + EPA monitor              | 9.2(1.7-28.5)    | 10.6(5.8-13.3)  | 0.5066               |
|                                        | Indoor                         | 13.2(1-132.8)    | 23.2(4-85.8)    | 0.1114               |
|                                        | Personal                       | 26.5(0.9-665.6)  | 28.6(4.1-122.3) | 0.9313               |
|                                        | p-value exposure <sup>c</sup>  | 0.0040           | 0.4803          |                      |
| Ozone (ppb)                            | Home + EPA monitor             | 28.7(5.3-68.8)   | 34.6(25.7-42.2) | 0.3247               |
|                                        | GPS + EPA monitor              | 28.8(5.3-68.8)   | 34.6(25.7-42.2) | 0.3264               |
|                                        | Indoor                         | 2.7(1.1-23.9)    | 2.2(1.2-3.2)    | 0.5882               |
|                                        | Personal                       | 3.2(1.5-12.2)    | 2.7(2.1-3.7)    | 0.3714               |
|                                        | p-value exposure <sup>c</sup>  | <.0001           | 0.0005          |                      |
| NO <sub>2</sub> (ppb)                  | Home + EPA monitor             | 16.3(4-35.8)     | 16.1(10.4-20)   | 0.9440               |
|                                        | GPS + EPA monitor              | 16.5(4-35)       | 16.1(10.4-20)   | 0.8873               |
|                                        | Indoor                         | 5(0-39)          | 0.5(0-2.1)      | 0.0689               |
|                                        | Personal                       | 5.3(0-27.4)      | 2.9(0.1-8.1)    | 0.2391               |
|                                        | p-value exposure <sup>c</sup>  | <.0001           | 0.0165          |                      |
| Temperature (°C)                       | Home + EPA monitor             | 12.3(-16.3-28.8) | 26(24.7-27)     | 0.0043               |
|                                        | GPS + EPA monitor              | 12.3(-16.3-28.8) | 26.1(24.8-27.2) | 0.0040               |
|                                        | Indoor                         | 23.9(17.1-52.8)  | 28(21.8-31.3)   | 0.0007               |
|                                        | Personal                       | 23.1(13.1-38.7)  | 28.8(24.5-37.3) | <.0001               |
|                                        | p-value exposure <sup>c</sup>  | <.0001           | 0.3580          |                      |

Abbreviation: GPS, global positioning system; EPA, US Environmental Protection Agency; PM<sub>2.5</sub>, particulate matter <2.5 microns; NO<sub>2</sub>, nitrogen dioxide

<sup>a</sup>The GPS and home method includes 24 participants, the personal monitoring method analysis includes 39 participants, and the indoors method include 40 participants.

<sup>b</sup>p-values were obtained cross sites by mixed models to account for within person variation.

<sup>c</sup>p-values were obtained cross assessment methods by mixed models to account for within person variation

Table S5. Correlation matrix for different pollutants across assessment methods.

| Pollutant                      | Assessment method | Personal | Indoor | GPS+EPA monitor | Home+EPA monitor |
|--------------------------------|-------------------|----------|--------|-----------------|------------------|
| PM <sub>2.5</sub> <sup>a</sup> | Personal          | 1.00     | 0.32   | -0.21           | -0.21            |
|                                | Indoor            | 0.32     | 1.00   | -0.21           | -0.19            |
|                                | GPS+EPA monitor   | -0.21    | -0.21  | 1.00            | 0.99             |
|                                | Home+EPA monitor  | -0.21    | -0.19  | 0.99            | 1.00             |
| Ozone <sup>b</sup>             | Personal          | 1.00     | -0.04  | 0.45            | 0.45             |
|                                | Indoor            | -0.04    | 1.00   | -0.13           | -0.12            |
|                                | GPS+EPA monitor   | 0.45     | -0.13  | 1.00            | 1.00             |
|                                | Home+EPA monitor  | 0.45     | -0.12  | 1.00            | 1.00             |
| NO <sub>2</sub>                | Personal          | 1.00     | 0.76   | -0.27           | -0.25            |
|                                | Indoor            | 0.76     | 1.00   | -0.32           | -0.23            |
|                                | GPS+EPA monitor   | -0.27    | -0.32  | 1.00            | 0.96             |
|                                | Home+EPA monitor  | -0.25    | -0.23  | 0.96            | 1.00             |
| Temperature                    | Personal          | 1.00     | 0.76   | 0.56            | 0.57             |
|                                | Indoor            | 0.76     | 1.00   | 0.62            | 0.62             |
|                                | GPS+EPA monitor   | 0.56     | 0.62   | 1.00            | 1.00             |
|                                | Home+EPA monitor  | 0.57     | 0.62   | 1.00            | 1.00             |

<sup>a</sup> indoor and personal estimates are assessed sequentially, and do not reflect the same dates.

<sup>b</sup> Ozone was measured as an aggregate estimate over the entire study period
